# Supplementary material for: gldc Is Essential for Renal Progenitor Patterning during Kidney Development
Source: MDPI journal article supplement (doi:10.3390/biomedicines10123220), 2022-12-12
Supplement: s1 [file s1]

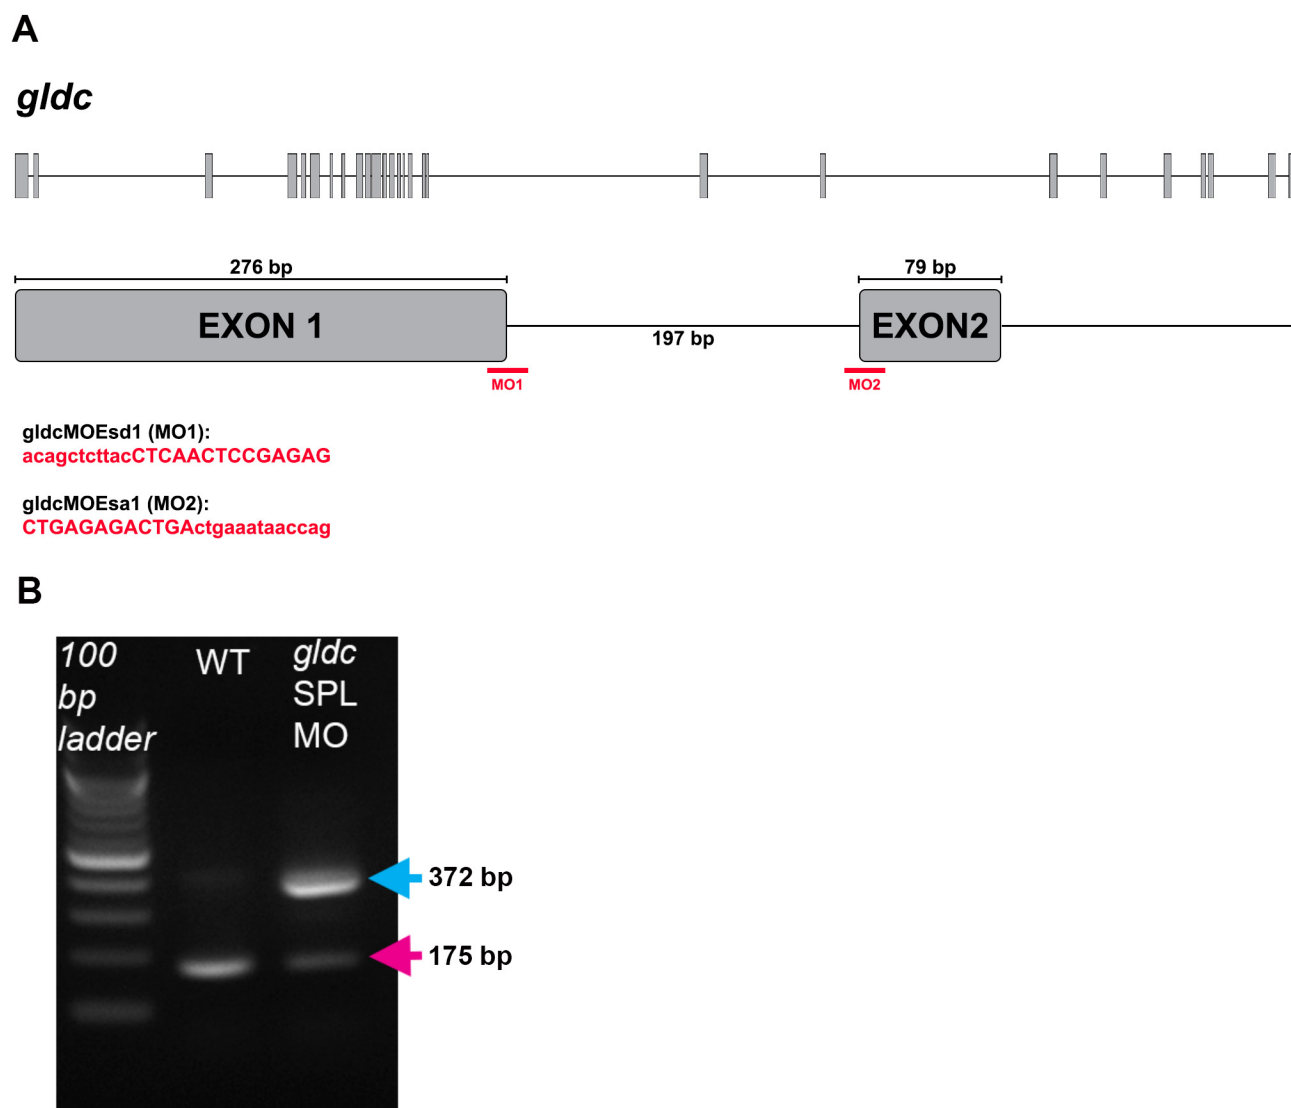

**Supplemental Figure S1. Design and validation of *gldc* knockdown tools.** (A) Gene map of *gldc* in zebrafish exhibit the location of the splice blocking morpholinos utilized with red underlines. (B) WT and *gldc* MO DNA was run on an agarose gel. The WT DNA ran to 175 base pairs as expected, and the *gldc* MO DNA exhibited two separate bands at 372 base pairs and 175 base pairs. The bands were cut and gel purified before sent to sequencing. Sequencing analysis confirmed *gldc* MOs retained intron 1 which encoded a premature stop codon.

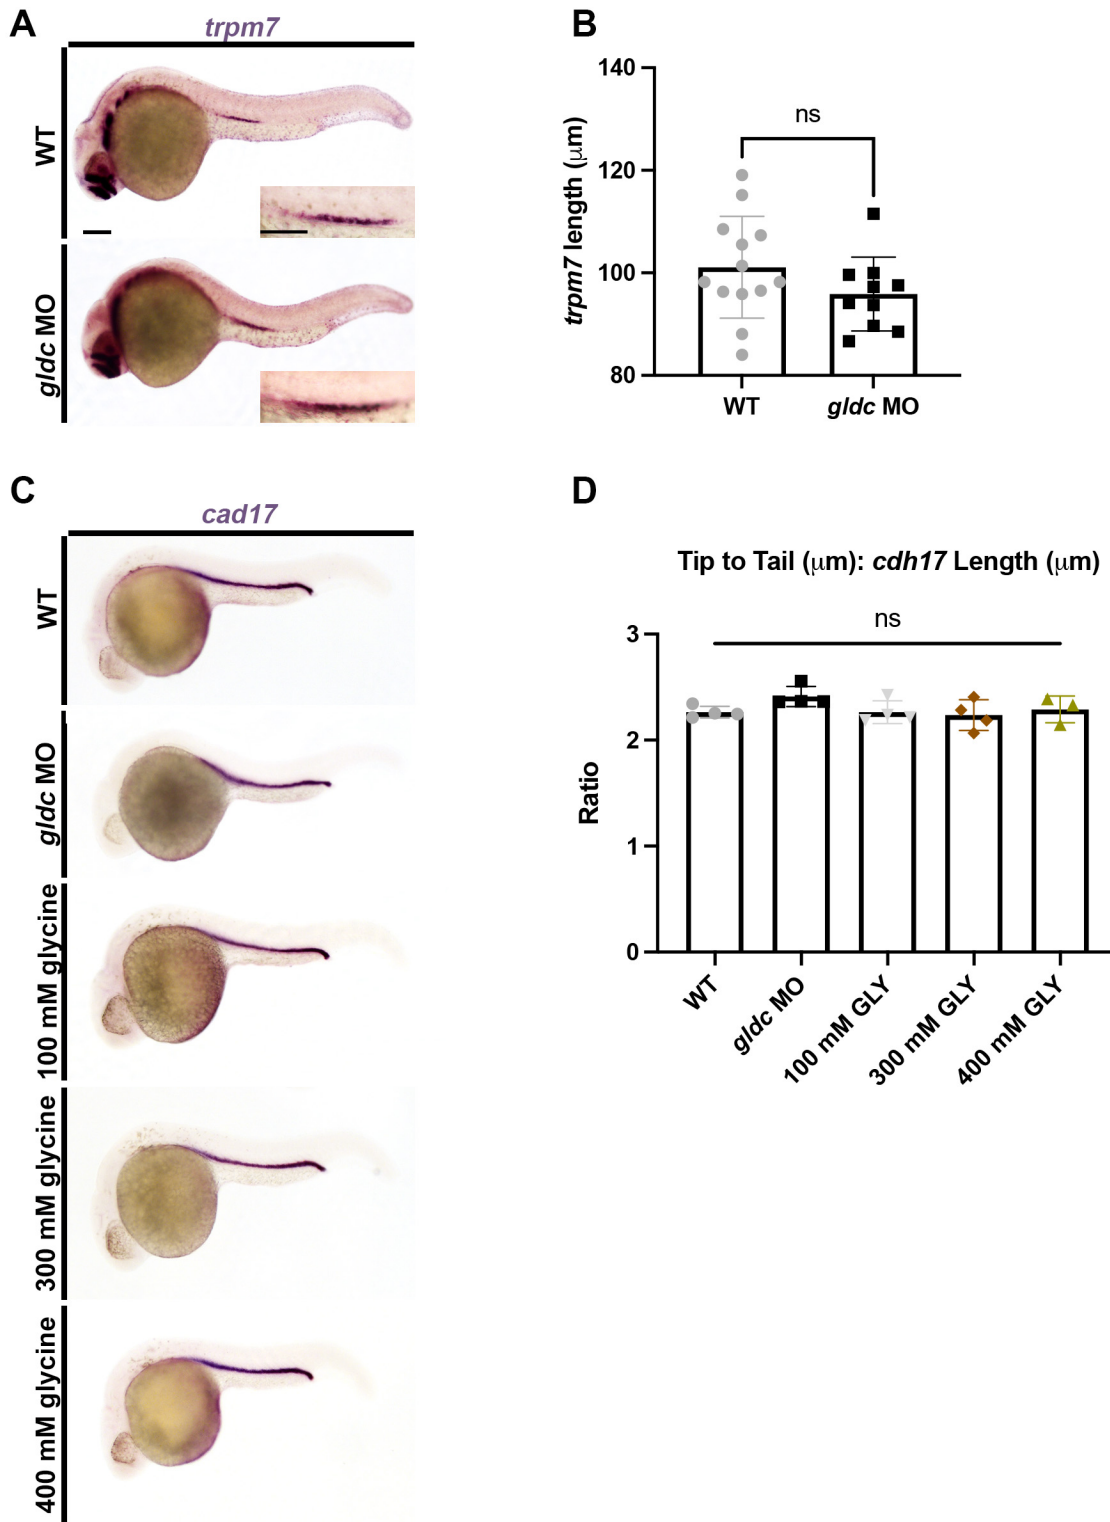

**Supplemental Figure S2. Additional nephron analysis in *glc* deficient embryos.** (A) WISH of *trpm7* in WT and *glc* MO at 24 hpf. Scale bars= 200  $\mu\text{M}$  (main image) and 50  $\mu\text{M}$  (inset). (B) Absolute length quantifications of *trpm7* domain in control and *glc* MO groups indicating no significant difference in length. (C) WISH of *cdh17* in WT, *glc* MO, and treated animals at 24 hpf. Scale bar= 200  $\mu\text{M}$ . (D) Ratios were calculated to compare tip to tail length versus the length of the entire tubule. There was no significant difference in the ratios between WT and treatment groups.  $n \geq 8$  for the control and treatment groups. Data are mean  $\pm$  s.d. Absolute lengths and ratios were compared with ANOVA.
